# Serotonin, Morphine, and Neuropathic Pain

## Not a Simple Story

Kelly Byrne, M.B.Ch.B., Ban Tsui, M.D.

NEUROPATHIC pain has long been described in the medical literature, from Paré's (Ambroise Paré, France, 1510–1590) description of phantom limb pain in the 1564 to Silas Mitchell's (1829–1914) description of complex regional pain syndrome during the American Civil War. However, a unifying theory of causation of these neuropathic pain syndromes and more importantly efficacious treatment remains elusive. Kimura *et al.*,<sup>1</sup> in this issue of *ANESTHESIOLOGY*, add some further basic science knowledge to the underlying changes that occur in the central nervous system with nerve injury. Importantly, they also show in a rat model of neuropathic pain that the efficacy of morphine as an analgesic agent is reduced. This adds to the controversial debate over whether opioids are effective in neuropathic pain.

A recent meta-analysis by the Cochrane collaboration looking at opioids in neuropathic pain added only eight further studies to its 2006 meta-analysis indicating little progress in this area during the past 7 yr.<sup>2</sup> Of the 31 studies identified, 17 looked at outcomes in using opioids for short periods (<24 h) and 14 looked at using opioids over longer periods (up to 12 weeks). Only half of the short-term studies showed a benefit of opioids over placebo, whereas all the longer-term studies showed a benefit for opioids over placebo, with a number needed to treat of 5.9 for a 50% reduction in pain. However, as pointed out by the Cochrane reviewers “these results are likely to be subject to significant bias because of small size, short duration, and potentially inadequate handling of drop-outs.” Leading them to conclude that “Analgesic efficacy of opioids in chronic neuropathic pain is subject to considerable uncertainty,” a statement that most chronic pain practitioners are likely to agree with.

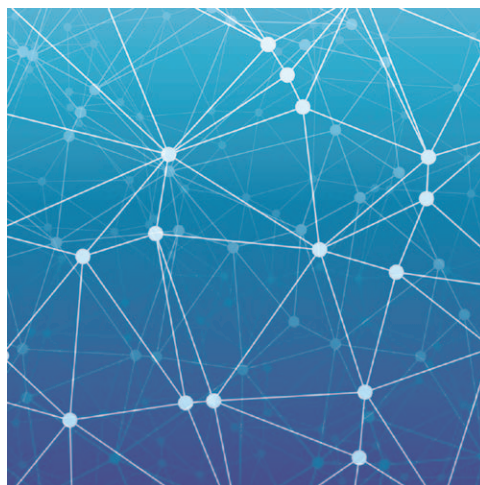

***“... this study adds knowledge to the complex web of neurotransmitter function in neuropathic pain, and it provides some evidence to the clinical observation that opioids are not very effective in neuropathic pain states.”***

serotonin reduce the efficacy of morphine in normal subjects, and could ondansetron be used to treat patients with neuropathic pain?

In an attempt to answer the latter question, there have been two small studies<sup>3,4</sup> in the literature using ondansetron for the treatment of neuropathic pain. They showed conflicting results, and a large randomized, placebo, controlled trial is probably required to answer the question definitively.

There are no trials in the literature specifically looking at the former question in actual patients experiencing pain. A small trial in volunteers seems to indicate no difference in the analgesic effects of morphine using an ondansetron dose of 16 mg.<sup>5</sup> From the literature on postoperative nausea and vomiting, there seems to be no increase in analgesic requirements

Although the evidence provided by this article broadly concurs with the conclusion of the Cochrane review, it is hard to know whether ligating the L5 spinal nerve of a rat provides a valid model for all types of neuropathic pain. This model of neuropathic pain is likely to provide a realistic replication of certain types of neuropathic pain in humans, such as phantom limb pain, or other situations where nerves have been badly injured, not mimic neuropathic pain caused by longstanding insidious causes such as diabetes.

The other obvious area of interest generated by this study is the differing effects of serotonin at the dorsal horn in normal and neuropathic pain. In one instance, it facilitates the analgesic effects of morphine in normal subjects; but in subjects with damaged nerves, it has the opposite effect and blunts the analgesic effect of morphine.

The manner in which they elucidated these differential effects, through the use of intrathecal ondansetron, raises two interesting clinical questions: does ondansetron

Image: ©Thinkstock.

Corresponding article on page 362.

Accepted for publication April 23, 2014. From the Department of Anaesthesia, Waikato Hospital, Hamilton, New Zealand (K.B.); and Department of Anesthesiology and Pain Medicine, University of Alberta, Edmonton, Alberta, Canada (B.T.).

Copyright © 2014, the American Society of Anesthesiologists, Inc. Lippincott Williams & Wilkins. *Anesthesiology* 2014; 121:217-8

when ondansetron is added to a patient-controlled analgesia agent for controlling nausea and vomiting.<sup>6,7</sup> Therefore, if there is an effect of ondansetron reducing the efficacy of morphine in clinical practice, it is probably small.

Ondansetron has relatively poor penetration of the central nervous system, and it may be that levels achieved in the dorsal horn after systemic administration are not high enough to cause any effect, and Kimura *et al.*<sup>1</sup> were unable to show the same effect with a smaller dose of ondansetron.

In addition to measuring the effect of serotonin in the spinal cord, Kimura *et al.* also considered the effect of systemic morphine on noradrenaline levels in the spinal cord. Although this same group have shown clearly that spinal noradrenaline release is responsible for some of the analgesic effects of both tramadol and antidepressants,<sup>8,9</sup> they were unable to show any increase in spinal cord noradrenaline with a systemic morphine dose.

Perhaps, a future direction would be to consider the neurotransmitter changes that occur using other clinically relevant opioids; are the results produced in this study true of fentanyl which is a much more specific  $\mu$ -receptor agonist, and of methadone which effects a host of different receptors to produce analgesia? Would this provide a laboratory basis for one opioid being more effective than another in neuropathic pain? A clinically important question which is as yet unanswered.

There are promising developments that seem to indicate that targeting the  $\mu$ - and  $\delta$ -receptors provides efficacious treatments for neuropathic pain,<sup>10,11</sup> time will tell whether this translates to clinically effective treatments. The *N*-methyl-D-aspartate and  $\gamma$ -aminobutyric acid B receptors are also implicated in the efficacy of methadone and oxycodone, respectively,<sup>12,13</sup> suggesting that these drugs may be better choices in the setting of neuropathic pain.

In summary, this study adds knowledge to the complex web of neurotransmitter function in neuropathic pain, and it provides some evidence to the clinical observation that opioids are not very effective in neuropathic pain states. Laboratory studies will continue to progress the pathophysiological understanding of neuropathic pain, whereas the acid test will be the clinical application of this knowledge to the treatment of patients in pain with the medications that we have currently available to us.

## Acknowledgments

The authors thank Jamie Sleight, M.D., Department of Anesthesia, Waikato Hospital, University of Auckland, Hamilton, New Zealand, for his help in proofreading this article.

## Competing Interests

Dr. Tsui has a licence agreement with Pajunk, Geisengen, Germany, and is in part funded by a grant from the CAS/Abbott Laboratories Career Scientist Award from the Canadian Society of Anesthesiologists, Toronto, Ontario, Canada, and an award from the Alberta Heritage Foundation for Medical

Research, Edmonton, Alberta, Canada. Dr. Byrne declares no competing interests.

## Correspondence

Address correspondence to Dr. Byrne: kelly.byrne@waikatodhb.health.nz

## References

- Kimura M, Obata H, Saito S: Peripheral nerve injury reduces analgesic effects of systemic morphine *via* spinal 5-hydroxytryptamine 3 receptors. *ANESTHESIOLOGY* 2014; 121:362–71
- McNicol ED, Midbari A, Eisenberg E: Opioids for neuropathic pain. *Cochrane Database Syst Rev* 2013; 8:CD006146
- McCleane GJ, Suzuki R, Dickenson AH: Does a single intravenous injection of the 5HT<sub>3</sub> receptor antagonist ondansetron have an analgesic effect in neuropathic pain? A double-blinded, placebo-controlled cross-over study. *Anesth Analg* 2003; 97:1474–8
- Tuveson B, Leffler AS, Hansson P: Ondansetron, a 5HT<sub>3</sub>-antagonist, does not alter dynamic mechanical allodynia or spontaneous ongoing pain in peripheral neuropathy. *Clin J Pain* 2011; 27:323–9
- Crews KR, Murthy BP, Hussey EK, Passannante AN, Palmer JL, Maixner W, Brouwer KL: Lack of effect of ondansetron on the pharmacokinetics and analgesic effects of morphine and metabolites after single-dose morphine administration in healthy volunteers. *Br J Clin Pharmacol* 2001; 51:309–16
- Boonmak P, Boonmak S, Bunsangjaroen P, Srichaipanha S, Poomsawat S, Nonlhaopol D: Antiemetic effect of ondansetron 0.2 mg/ml in PCA morphine solution. *Eur J Anaesthesiol* 2007; 24:664–7
- Jellish WS, Leonetti JP, Sawicki K, Anderson D, Oritano TC: Morphine/ondansetron PCA for postoperative pain, nausea, and vomiting after skull base surgery. *Otolaryngol Head Neck Surg* 2006; 135:175–81
- Nakajima K, Obata H, Iriuchijima N, Saito S: An increase in spinal cord noradrenaline is a major contributor to the antihyperalgesic effect of antidepressants after peripheral nerve injury in the rat. *Pain* 2012; 153:990–7
- Kimura M, Obata H, Saito S: Antihypersensitivity effects of tramadol hydrochloride in a rat model of postoperative pain. *Anesth Analg* 2012; 115:443–9
- Linz K, Christoph T, Tzschentke TM, Koch T, Schiene K, Gautrois M, Schröder W, Kögel BY, Beier H, Englberger W, Schunk S, De Vry J, Jähnel U, Frosch S: Cebranopadol: A novel potent analgesic nociceptin/orphanin FQ peptide and opioid receptor agonist. *J Pharmacol Exp Ther* 2014; 349:535–48
- Matsumoto K, Narita M, Muramatsu N, Nakayama T, Misawa K, Kitajima M, Tashima K, Devi LA, Suzuki T, Takayama H, Horie S: Orally active opioid  $\mu/\delta$  dual agonist MGM-16, a derivative of the indole alkaloid mitragynine, exhibits potent antiallodynic effect on neuropathic pain in mice. *J Pharmacol Exp Ther* 2014; 348:383–92
- Sotgiu ML, Valente M, Storch R, Caramenti G, Biella GE: Cooperative *N*-methyl-D-aspartate (NMDA) receptor antagonism and  $\mu$ -opioid receptor agonism mediate the methadone inhibition of the spinal neuron pain-related hyperactivity in a rat model of neuropathic pain. *Pharmacol Res* 2009; 60:284–90
- Thibault K, Calvino B, Rivals I, Marchand F, Dubacq S, McMahon SB, Pezet S: Molecular mechanisms underlying the enhanced analgesic effect of oxycodone compared to morphine in chemotherapy-induced neuropathic pain. *PLoS One* 2014; 9:e91297
